# Supplementary material for: Undergraduate Performance in Solving Ill-Defined Biochemistry Problems
Source: Atypon-hosted journal article supplement (doi:10.1187/cbe.15-04-0106), 2017-11-28
Supplement: combinedsupmats.pdf [file combinedsupmats.pdf]

# Supplemental Material

*CBE—Life Sciences Education*

Sensibaugh *et al.*

**Undergraduate performance in solving  
ill-defined biochemistry problems**

**Cheryl A. Sensibaugh, Nathaniel J. Madrid, Hye-Jeong Choi,**

**William L. Anderson, Marcy P. Osgood**

|                                                           |    |
|-----------------------------------------------------------|----|
| The Lorrat: A Biochemistry Program Exit IPISA.....        | 2  |
| Scoring Rubrics for The Lorrat.....                       | 9  |
| Qualitative Content Analysis Codes (Tables S1 – S5) ..... | 12 |

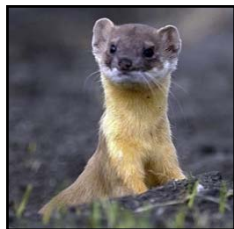

## The Llorrat

### Hypothesize

During one of your many hikes on top of Sandia Mountain (10,600 ft.), you come across a rapidly scurrying mammal that you have never seen before. Intrigued, you ask the folks at the Southwestern Museum of Biology what is known about the little animal. They tell you that this furry high-altitude creature, the llorrat, has been well-studied and is extremely unusual in its physiology for several reasons:

- It is an incredible athlete; it can run for hours without tiring.
- It is able to remain slim (reduction in adipose tissue) even when fed large portions of high-fat food in captivity.
- It stays active all winter, and its body temperature remains high even during its sleeping hours, even during very cold periods, which is unlike other small mammals.

While the llorrat's physiological abilities are well-known, the biochemical mechanisms for these have not yet been studied. This is where you come in...

**What are your BIOCHEMICAL hypotheses to explain the Llorrat's unique physiological abilities?**

## Literature

Field researchers have not observed any unusual changes in the lorrat population over the past three years, either in numbers or in habitat. Lorrats are typically awake for about 20 hours daily, and are extremely active during most of that time. The lorrat's diet consists mainly of pinon seeds and small insects, for which it forages constantly. Therefore, lorrats must continually change their feeding location, leaving little food for other small mammals.

Before designing experiments to test your hypothesis, you search the literature about lorrat metabolism, and find that it focuses on phosphoenolpyruvate carboxykinase (PEPCK). The PEPCK enzyme has a role in carbohydrate, lipid, and protein metabolism, as shown in the exhibit below.

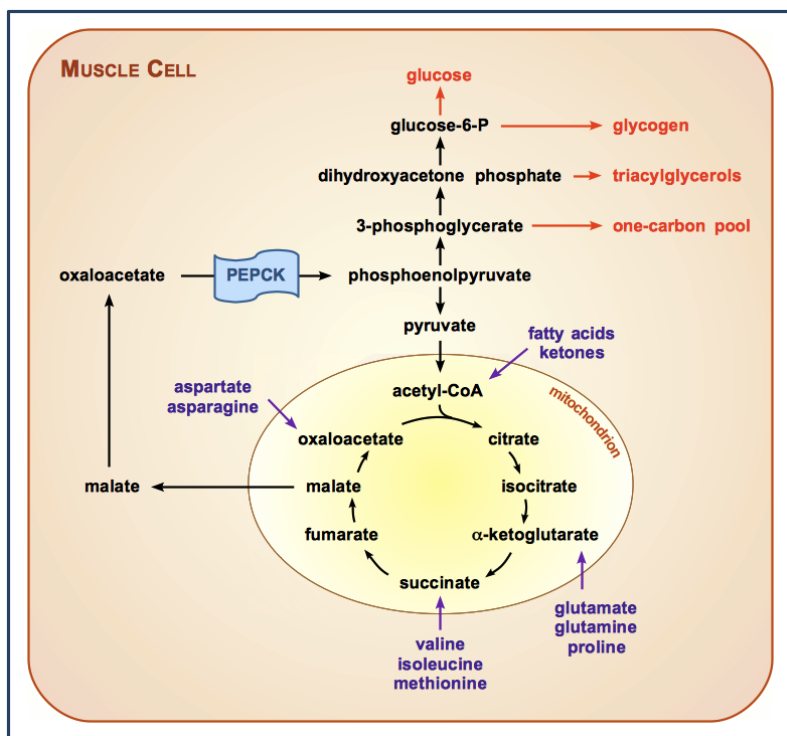

Adapted from Yang *et al.* (2009) *J BiolChem*, 284(40), 27025-27029.

Previous studies have demonstrated greater muscle PEPCK activity in lorrats than in other small mammals.

Together with other evidence, the literature suggests that the unique physiological abilities of the lorrat may be the result of PEPCK upregulation, which could be due to a number of factors such as gene copy number, transcription, translation, enzyme activity, or other regulatory mechanisms.

## Investigate

A staff member at the Southwestern Museum of Biology has introduced you to the field researchers. They have maintained their stock of lorrat tissue samples, and are excited to collaborate with you during your investigation. However, they will only provide the samples; you must design the experiments.

Given the hypothesis that **PEPCK is upregulated in lorrat muscle at the transcriptional level**, **briefly describe your proposed experimental design, with appropriate controls, to test this hypothesis. DO NOT simply name a technique, but rather explain the reasoning for your design and how the methods will provide supportive evidence.**

## Evaluate

To lend support for the PEPCK transcriptional upregulation hypothesis, muscle tissues from both the lorrat and the common laboratory rat were first analyzed to establish preliminary indicators of increased PEPCK transcription and activity. Three characteristic parameters were compared: enzyme concentration, enzyme activity, and the Michaelis constant ( $K_m$ ).

Following homogenization and centrifugation of the tissue samples, the soluble fractions of each sample were used for enzyme analyses. Two different enzymes in the supernatant were assayed, PEPCK and aldolase.

Enzyme concentration was determined using a competitive inhibition enzyme immune assay. Enzyme activity was determined using standard substrates for the two different enzymes, with a unit of activity defined as micromoles of product formed per minute. Concentration and activity values were normalized per gram of muscle tissue used in the initial homogenate. The  $K_m$  values were determined using standard Michaelis-Menten kinetics.

The results of these tests are shown below.

| <u>Protein Characteristic</u>      | <u>Rat</u> | <u>Lorlat</u> |
|------------------------------------|------------|---------------|
| [Aldolase] (ng/g tissue)           | 12         | 12            |
| Aldolase activity (units/g tissue) | 40         | 41            |
| Aldolase $K_m$ (mM)                | 0.062      | 0.061         |
| [PEPCK] (ng/g tissue)              | 15         | 30            |
| PEPCK activity (units/g tissue)    | 45         | 90            |
| PEPCK $K_m$ (mM)                   | 0.012      | 0.013         |

**How do the parameters of interest compare across the two species?**

## **Integrate**

The previous data confirmed increased expression of PEPCK in the lorrat muscle as compared to the white laboratory rat, with an equivalent increase in enzyme activity but without any alteration of  $K_m$ . To further probe whether this increased expression of PEPCK might be responsible for the unusual physiology of the lorrat, several common metabolites were quantified.

To investigate the metabolism of the lorrat, ten rat biopsies and three lorrat biopsies (L1, L2, and L3) of muscle tissue were evaluated for concentrations of glucose (A), glycogen (B), creatine (C), and triacylglycerol (D). Blood samples were also taken after 30 minutes of exercise to measure lactate levels (E). Means and standard deviations were calculated for the rat measurements. The PEPCK activities for the samples were measured as previously described.

The data are reported in the five panels of the exhibit below.

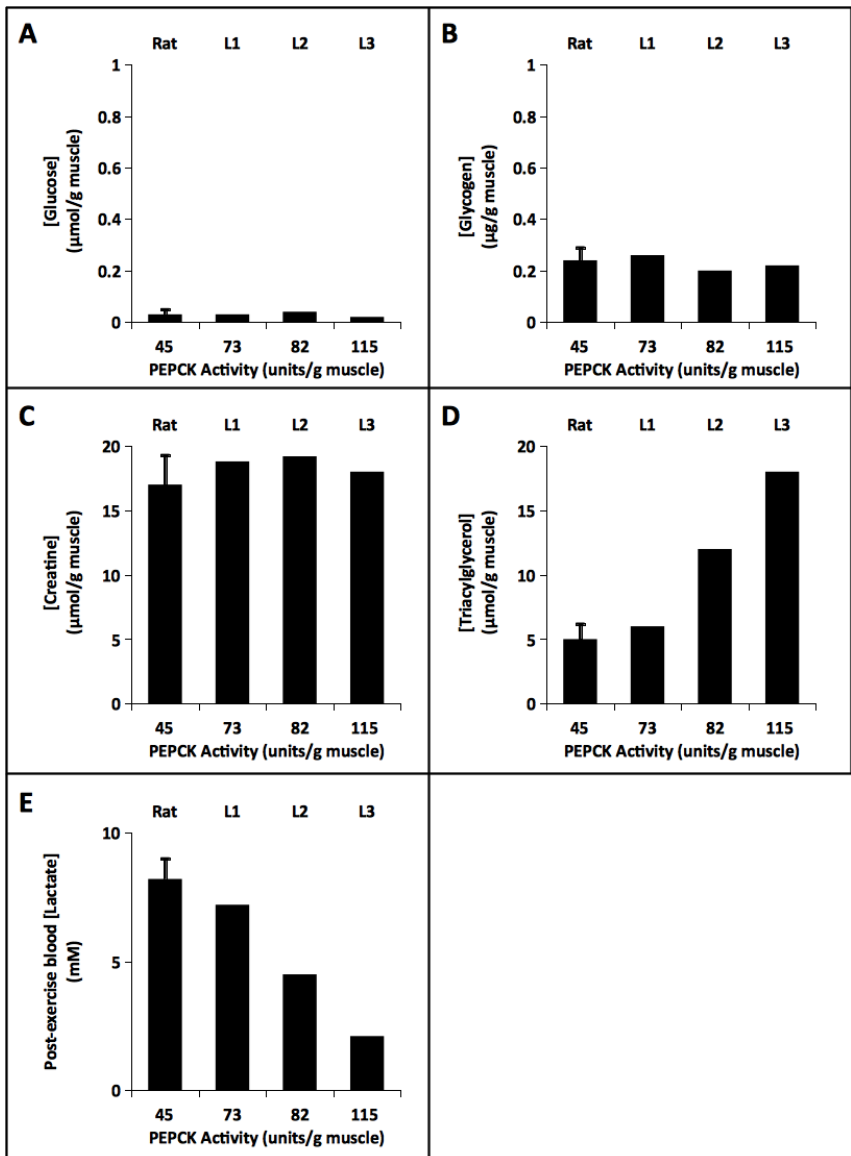

How do you interpret the data collected throughout this investigation, to explain any role that PEPCK might have in the lorry achieving its unique physiological abilities?

Be sure to address the results of the previous protein assays, these new metabolic assays, and any other relevant information.



## Reflect

After graduating with your biochemistry degree, you take another enjoyable hike in the Sandia Mountains (secretly hoping to see another lorrat). You recall all that you learned about the lorrat, especially the savory moment when you were the first person to discover its increased levels of muscle PEPCK.

Though PEPCK has been previously described as primarily a gluconeogenic enzyme, in the lorrat muscle it acts mainly to generate high levels of DHAP. This leads to high levels of muscle triacylglycerols, which are then used by the muscle as fuel for aerobic catabolism, allowing the lorrat to run for a long time, while generating little to no lactate.

Your mind wanders back and forth between the lorrat itself and the investigation. Looking back, please answer the following questions:

- 1) Were you able to meet each of the tasks required in this case?**
- 2) What aspects of your undergraduate education helped you the most for solving this case?**
- 3) In one sentence or less, describe any personal relevance of working through this case study.**

### Scoring Rubrics: The Lorrat

|                       |                                                                                                              |                                                                                                                                                                                                                                                                                                                                                                                                                                                                                                                                                                                                                                                                                                                                                                  |
|-----------------------|--------------------------------------------------------------------------------------------------------------|------------------------------------------------------------------------------------------------------------------------------------------------------------------------------------------------------------------------------------------------------------------------------------------------------------------------------------------------------------------------------------------------------------------------------------------------------------------------------------------------------------------------------------------------------------------------------------------------------------------------------------------------------------------------------------------------------------------------------------------------------------------|
| Hypothesize<br>Domain | What are your top four <u>biochemical</u> hypotheses to explain the Lorrat's unique physiological abilities? |                                                                                                                                                                                                                                                                                                                                                                                                                                                                                                                                                                                                                                                                                                                                                                  |
|                       | 10<br>9<br>8<br>7<br><br>6<br>5<br>4<br><br>3<br>2<br>1<br>0                                                 | Three hypotheses with rationales<br>Three hypotheses<br>Two hypotheses with rationales<br>Two hypotheses about the following:<br>Altered genetics/genetic processing of metabolic proteins<br>Altered regulation of body temperature<br>Altered cellular structure (more mitochondria)<br>Oxygen transport/delivery (lung capacity, Hb, Mb, BPG)<br>Nutritional deficiency<br>Environment (infection or toxin)<br>Trauma<br>Cancer<br>Autoimmune<br>One hypothesis with rationale<br>One hypothesis<br>Unacceptable hypotheses:<br>Teleological conceptions (outcomes)<br>Increased/fast metabolism<br>Increased energy needed for proliferation<br>Pattern-matching<br>Restating the case/problem (something functions differently)<br>Off-topic<br>No response |

|                       |                                                                                                                                                                                                                                                |                                                                                                                                                                                                                                                                                                                                                                                                                                                                                                                                                                                                                                                                                                                                                                                                             |
|-----------------------|------------------------------------------------------------------------------------------------------------------------------------------------------------------------------------------------------------------------------------------------|-------------------------------------------------------------------------------------------------------------------------------------------------------------------------------------------------------------------------------------------------------------------------------------------------------------------------------------------------------------------------------------------------------------------------------------------------------------------------------------------------------------------------------------------------------------------------------------------------------------------------------------------------------------------------------------------------------------------------------------------------------------------------------------------------------------|
| Investigate<br>Domain | Briefly describe your proposed experimental design, with appropriate controls, to test this hypothesis. DO NOT simply name a technique, but rather explain the reasoning for your design and how the methods will provide supportive evidence. |                                                                                                                                                                                                                                                                                                                                                                                                                                                                                                                                                                                                                                                                                                                                                                                                             |
|                       | 10<br>9<br>8<br><br>7<br><br>6<br>5<br>4<br>3<br>2<br>1                                                                                                                                                                                        | As for 7, with three of the below<br>As for 7, with two of the below<br>As for 7, with one of the below:<br>rationale = to detect transcription<br>expected results<br>interpretation of expected results<br>All four of the following:<br>Method<br>Quantitative RT-PCR, luciferase/beta-gal reporter assay,<br>electrophoresis/northern blot, hybridization techniques<br>(cDNA microarray measuring hybridization of mRNA is theoretically logical)<br>(Negative) Control – small mammal reference sample<br>IV - differences in transcription<br>DV – PEPCK mRNA in muscle tissue<br>One of the above missing/incorrect<br>Two of the above missing/incorrect<br>Three of the above missing/incorrect<br>Four of the above incorrect<br>Proposal is not aligned with hypothesis (kinetics)<br>Off-topic |

|  |   |             |
|--|---|-------------|
|  | 0 | No response |
|--|---|-------------|

|                    |                                                                   |                                                                                                                           |
|--------------------|-------------------------------------------------------------------|---------------------------------------------------------------------------------------------------------------------------|
| Evaluate<br>Domain | How do the parameters of interest compare across the two species? |                                                                                                                           |
|                    | 10                                                                | As in 7, with specific activity AND value of aldolase control                                                             |
|                    | 9                                                                 | As in 7, with specific activity OR value of aldolase                                                                      |
|                    | 8                                                                 | As in 7, with specific activity (same)<br>OR value of aldolase (validity of result), but incorrect or vague               |
|                    | 7                                                                 | All of the following:<br>For Lorrat compared to control<br>Increased [PEPCK]<br>Increased PEPCK activity<br>Equivalent Km |
|                    | 6                                                                 | One of the above missing/incorrect                                                                                        |
|                    | 5                                                                 | Two of the above missing/incorrect                                                                                        |
|                    | 4                                                                 | Three of the above missing/incorrect                                                                                      |
|                    | 3                                                                 | Four of the above incorrect                                                                                               |
|                    | 2                                                                 | Explain methods                                                                                                           |
| 1                  | Off-topic                                                         |                                                                                                                           |
| 0                  | No response                                                       |                                                                                                                           |

|                     |                                                                                                                                                                                                                                                                                                              |                                                                                                                                                                                                                                                               |
|---------------------|--------------------------------------------------------------------------------------------------------------------------------------------------------------------------------------------------------------------------------------------------------------------------------------------------------------|---------------------------------------------------------------------------------------------------------------------------------------------------------------------------------------------------------------------------------------------------------------|
| Integrate<br>Domain | How do you interpret the data collected throughout this investigation, to explain any role that PEPCK might have in the lorrata achieving its unique physiological abilities? Be sure to address the results of the previous protein assays, these new metabolic assays, and any other relevant information. |                                                                                                                                                                                                                                                               |
|                     | 10                                                                                                                                                                                                                                                                                                           | All eight of the following:<br>Increased muscle PEPCK expression/concentration<br>→ high PEPCK activity<br>→ high DHAP (some reference to glycerol)<br>→ high TAGs<br>→ aerobic catabolism<br>→ (a) low lactate<br>→ (b) high ATP yield<br>→ unique abilities |
|                     | 9                                                                                                                                                                                                                                                                                                            | Seven of the above                                                                                                                                                                                                                                            |
|                     | 8                                                                                                                                                                                                                                                                                                            | Six of the above                                                                                                                                                                                                                                              |
|                     | 7                                                                                                                                                                                                                                                                                                            | Five of the above                                                                                                                                                                                                                                             |
|                     | 6                                                                                                                                                                                                                                                                                                            | Four of the above                                                                                                                                                                                                                                             |
|                     | 5                                                                                                                                                                                                                                                                                                            | Three of the above                                                                                                                                                                                                                                            |
|                     | 4                                                                                                                                                                                                                                                                                                            | Two of the above                                                                                                                                                                                                                                              |
|                     | 3                                                                                                                                                                                                                                                                                                            | One of the above                                                                                                                                                                                                                                              |
|                     | 2                                                                                                                                                                                                                                                                                                            | Incorrect interpretation                                                                                                                                                                                                                                      |
| 1                   | Off-topic                                                                                                                                                                                                                                                                                                    |                                                                                                                                                                                                                                                               |
| 0                   | No response                                                                                                                                                                                                                                                                                                  |                                                                                                                                                                                                                                                               |

|                   |                                                                                                                                                                                                                                                                                                                            |                                                                                                                                                                                                                                                                                                                                                                                                                                                                                                                                                                                  |
|-------------------|----------------------------------------------------------------------------------------------------------------------------------------------------------------------------------------------------------------------------------------------------------------------------------------------------------------------------|----------------------------------------------------------------------------------------------------------------------------------------------------------------------------------------------------------------------------------------------------------------------------------------------------------------------------------------------------------------------------------------------------------------------------------------------------------------------------------------------------------------------------------------------------------------------------------|
| Reflect<br>Domain | Looking back, please answer the following questions:<br>1) Were you able to meet each of the tasks required in this case?<br>2) What aspects of your undergraduate education helped you the most for solving this case?<br>3) In one sentence or less, describe any personal relevance of working through this case study. |                                                                                                                                                                                                                                                                                                                                                                                                                                                                                                                                                                                  |
|                   | 10<br>9<br>8<br><br>7<br><br>6<br>5<br>4<br>3<br>2<br>1<br>0                                                                                                                                                                                                                                                               | As for 7, with three of the below<br>As for 7, with two of the below<br>As for 7, with one of the below:<br>Self-assessment is accurate<br>Describe method for improvement<br>Helped learn process not just facts<br>Addressed all three of the following:<br>Self-assessment (do not accept "I hope so.")<br>Most helpful program aspect<br>Personal relevance is helped learn content, saw improvement over time, need for<br>future profession, etc.(it counts as long as it's addressed)<br>Two of the above<br>One of the above<br><br><br><br><br>Off-topic<br>No response |

### Qualitative Content Analysis Codes

| <b>Table S1.</b> Characterization of unsatisfactory responses for the Hypothesize domain |                   |
|------------------------------------------------------------------------------------------|-------------------|
| <b>Coded Segments</b>                                                                    | <b>Prevalence</b> |
| Acceptable Segments                                                                      |                   |
| Mechanistic hypotheses                                                                   |                   |
| Oxygen transport or delivery                                                             | 13%               |
| Altered genetics or genetic processing of metabolic proteins                             | 9%                |
| Altered cellular structure                                                               | 6%                |
| Altered regulation of body temperature                                                   | 2%                |
| Nutritional supplement                                                                   | 1%                |
| Total acceptable segments                                                                | 31%               |
| Unacceptable Segments                                                                    |                   |
| Unmechanistic hypotheses                                                                 |                   |
| Increased or fast metabolism                                                             | 29%               |
| Vague mechanism of lipid metabolism                                                      | 16%               |
| Vague mechanism of carbohydrate or CAC metabolism                                        | 4%                |
| Inconsistent with given information                                                      | 9%                |
| Teleological conceptions                                                                 |                   |
| Adapted to environment                                                                   | 4%                |
| Efficient energy use                                                                     | 2%                |
| Proliferation                                                                            | 1%                |
| Other unacceptable hypothesis                                                            | 5%                |
| Total unacceptable segments                                                              | 69%               |
| (n responses = 39; n segments = 114; Values are rounded)                                 |                   |

| <b>Table S2.Characterization of unsatisfactory responses for the Investigate domain</b> |                   |
|-----------------------------------------------------------------------------------------|-------------------|
| <b>Coded Segments</b>                                                                   | <b>Prevalence</b> |
| <b>Acceptable Segments</b>                                                              |                   |
| Experimental design aligns with hypothesis                                              |                   |
| Appropriate dependent variable                                                          | 8%                |
| Appropriate method                                                                      | 7%                |
| Appropriate negative control                                                            | 6%                |
| Appropriate independent variable                                                        | 5%                |
| Appropriate rationale                                                                   | 5%                |
| Statement of expected results                                                           | 3%                |
| Interpretation of expected results                                                      | 1%                |
| Total acceptable segments                                                               | 34%               |
| <b>Unacceptable Segments</b>                                                            |                   |
| Experimental design does not align with hypothesis                                      |                   |
| Inappropriate method                                                                    |                   |
| Enzyme kinetics/activity                                                                | 21%               |
| Protein quantification                                                                  | 17%               |
| Other                                                                                   | 9%                |
| Cell biology method                                                                     | 5%                |
| Dietary induction                                                                       | 3%                |
| Inappropriate negative control                                                          | 7%                |
| Inappropriatedependent variable                                                         | 4%                |
| Inappropriateindependent variable                                                       | 1%                |
| Total unacceptable segments                                                             | 66%               |
| (n responses = 39; n segments = 108; Values are rounded)                                |                   |

| <b>Table S3.Characterization of unsatisfactory responses for the Evaluate domain</b> |                   |
|--------------------------------------------------------------------------------------|-------------------|
| <b>Coded Segments</b>                                                                | <b>Prevalence</b> |
| <b>Acceptable Segments</b>                                                           |                   |
| Correct results                                                                      |                   |
| Increased PEPCK activity                                                             | 16%               |
| Comparing Lorrat to control                                                          | 15%               |
| Increased PEPCK concentration                                                        | 12%               |
| Equivalent Km                                                                        | 7%                |
| Specific activity is the same                                                        | 3%                |
| Importance of aldolase is to validate results                                        | 2%                |
| Total acceptable segments                                                            | 56%               |
| <b>Unacceptable Segments</b>                                                         |                   |
| Extending response beyond Evaluate                                                   |                   |
| Addressing the Integrate domain                                                      | 19%               |
| Addressing the Hypothesize domain                                                    | 4%                |
| Incorrect results                                                                    |                   |
| Incorrect/vague importance of aldolase                                               | 10%               |
| Incorrect PEPCK Km                                                                   | 9%                |
| Incorrect PEPCK concentration                                                        | 1%                |
| Explain methods                                                                      | 1%                |
| Total unacceptable segments                                                          | 44%               |

(n responses = 19; n segments = 99; Values are rounded)

**Table S4.**Characterization of unsatisfactory responses for the Integrate domain

| <b>Coded Segments</b>                                      | <b>Prevalence</b> |
|------------------------------------------------------------|-------------------|
| <b>Acceptable Segments</b>                                 |                   |
| Plausible conclusions                                      |                   |
| Low lactate due to aerobic catabolism                      | 10%               |
| Unique abilities arise from molecular phenomena            | 10%               |
| Glucose, glycogen, and/or creatine conclusion(s)           | 4%                |
| High ATP yield from aerobic catabolism                     | 3%                |
| Aerobic catabolism is occurring                            | 1%                |
| Correct results                                            |                   |
| High triacylglycerol levels                                | 17%               |
| Glucose, glycogen, and/or creatine result(s)               | 9%                |
| High PEPCK activity                                        | 6%                |
| Increased muscle PEPCK expression/concentration            | 5%                |
| High DHAP levels, or reference to glycerol                 | 2%                |
| Broad introductory statement                               | 8%                |
| Total acceptable segments                                  | 77%               |
| <b>Unacceptable Segments</b>                               |                   |
| Unsubstantiated or incorrect conclusions                   |                   |
| Low lactate indicates lactate is being catabolized         | 4%                |
| High TAG indicates fatty acids are converted into pyruvate | 3%                |
| High TAG indicates fatty acids are not being catabolized   | 2%                |
| High TAG indicates altered fatty acid transport            | 2%                |
| High TAG indicates dietary induction of PEPCK              | 1%                |
| Results indicate metabolites affect PEPCK activity         | 3%                |
| Results support the student's initial hypothesis           | 2%                |
| Incorrect results                                          | 4%                |
| Vague results                                              | 2%                |
| Total unacceptable segments                                | 23%               |

(n responses = 21; n segments = 98; Values are rounded)

**Table S5.**Characterization of unsatisfactory responses for the Reflect domain

| <b>Coded Segments</b>                          | <b>Prevalence</b> |
|------------------------------------------------|-------------------|
| <b>Acceptable Segments</b>                     |                   |
| Incomplete response                            |                   |
| Addressed part 2 - most helpful program aspect | 42%               |
| Addressed part 1 - self-assessment             | 38%               |
| Self-assessment is accurate                    | 8%                |
| Addressed part 3 - personal relevance          | 4%                |
| Helped learn process not just facts            | 4%                |
| Total acceptable segments                      | 96%               |
| <b>Unacceptable Segments</b>                   |                   |
| Thoughtless self-assessment                    | 4%                |
| Total unacceptable segments                    | 4%                |

(n responses = 10; n segments = 24; Values are rounded)
